# Supplementary material for: The multifactorial nature of beak and skull shape evolution in parrots and cockatoos (Psittaciformes)
Source: PubMed Central journal article supplement (PMC6525378; doi:10.1186/s12862-019-1432-1), 2019-05-17

**The multifactorial nature of beak and skull shape evolution in parrots and cockatoos  
(Psittaciformes)**

Jen A. Bright, Jesús Marugán-Lobón, Emily J. Rayfield, Samuel N. Cobb

*BMC Evolutionary Biology*

**Additional File 5**

Interactive 3D visualisations of the positive and negative warps along PCs 1 – 3. Warp template is based on a CT scan of *Conuropsis carolinensis*. Click skulls to activate 3D.

Principal Component 1 (positive)

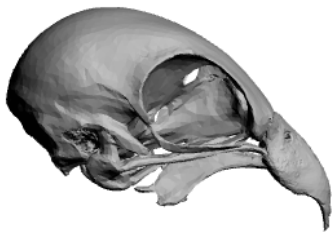

Principal Component 1 (negative)

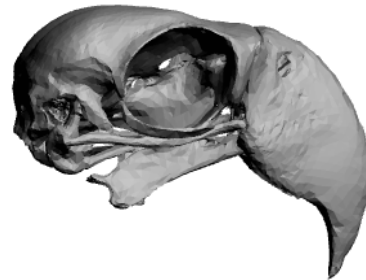

Principal Component 2 (positive)

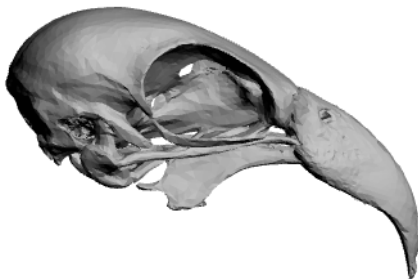

Principal Component 2 (negative)

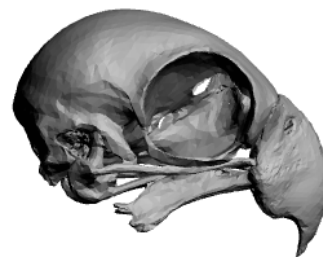

Principal Component 3 (positive)

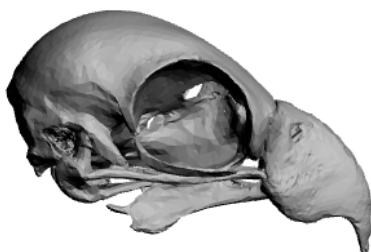

Principal Component 3 (negative)

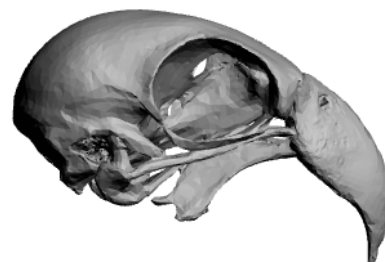

Supplement: 12862_2019_1432_MOESM5_ESM.pdf [file 12862_2019_1432_MOESM5_ESM.pdf]
